# Supplementary material for: FGFR1–4 RNA-Based Gene Alteration and Expression Analysis in Squamous Non-Small Cell Lung Cancer
Source: MDPI journal article supplement (doi:10.3390/ijms231810506), 2022-09-10
Supplement: s1 [file s1]

# FGFR1–4 RNA-Based Gene Alteration and Expression Analysis in Squamous Non-Small Cell Lung Cancer

Joanna Moes-Sosnowska<sup>1</sup>, Monika Skupinska<sup>2</sup>, Urszula Lechowicz<sup>1</sup>, Ewa Szczepulska-Wojcik<sup>3</sup>, Paulina Skronska<sup>1</sup>, Adriana Rozy<sup>1</sup>, Aneta Stepniewska<sup>1</sup>, Renata Langfort<sup>3</sup>, Piotr Rudzinski<sup>4</sup>, Tadeusz Orlowski<sup>4</sup>, Delfina Popiel<sup>2</sup>, Aleksandra Stanczak<sup>5</sup>, Maciej Wieczorek<sup>2,5</sup>, Joanna Chorostowska-Wynimko<sup>1\*</sup>

<sup>1</sup> Department of Genetics and Clinical Immunology, National Institute of Tuberculosis and Lung Diseases, 01-138 Warsaw, Poland;

<sup>2</sup> Preclinical Development Department, Celon Pharma S.A, Research & Development Centre, 05-152 Kazun Nowy, Poland;

<sup>3</sup> Department of Pathology, National Institute of Tuberculosis and Lung Diseases, 01-138 Warsaw, Poland;

<sup>4</sup> Department of Surgery, National Institute of Tuberculosis and Lung Diseases, 01-138 Warsaw, Poland;

<sup>5</sup> Clinical Development Department, Celon Pharma S.A., Research & Development Centre, 05-152 Kazun Nowy, Poland;

\* Correspondence: j.chorostowska@gmail.com or j.chorostowska@igichp.edu.pl

This PDF file includes:

Supplementary Tables S1 to S2

Supplementary Figures S1 to S5

## Supplementary Tables

**Table S1.** Fusions and oncogenic isoforms revealed with use of the Archer FusionPlex Lung gene panel in the commercial control sample Seraseq (QC 242.50).

|    | Genes           | SS  | Reads | %Reads | Strong | Breakpoint                    | Category          |
|----|-----------------|-----|-------|--------|--------|-------------------------------|-------------------|
| 1  | CD74::ROS1      | 18  | 30    | 41.1   | True   | chr5:149784243,chr6:117645578 | Fusion            |
| 2  | EGFR            | 124 | 373   | 93.02  | True   | chr7:55087058,chr7:55223523   | Oncogenic Isoform |
| 3  | EGFR::SEPT14    | 91  | 122   | 92.42  | True   | chr7:55268106,chr7:55863785   | Fusion            |
| 4  | EML4::ALK       | 65  | 316   | 96.05  | True   | chr2:42522656,chr2:29446394   | Fusion            |
| 5  | ETV6::NTRK3     | 55  | 143   | 100.0  | True   | chr12:12022903,chr15:88483984 | Fusion            |
| 6  | FGFR3::BAIAP2L1 | 45  | 234   | 50.11  | True   | chr4:1808661,chr7:97991744    | Fusion            |
| 7  | FGFR3::TACC3    | 57  | 255   | 51.41  | True   | chr4:1808661,chr4:1741429     | Fusion            |
| 8  | KIF5B::RET      | 80  | 266   | 97.79  | True   | chr10:32306071,chr10:43609928 | Fusion            |
| 9  | LMNA::NTRK1     | 62  | 175   | 42.89  | True   | chr1:156100564,chr1:156844698 | Fusion            |
| 10 | MET             | 17  | 25    | 69.44  | True   | chr7:116411708,chr7:116414935 | Oncogenic Isoform |
| 11 | NCOA4::RET      | 69  | 234   | 63.93  | True   | chr10:51582939,chr10:43612032 | Fusion            |
| 12 | SLC34A2::ROS1   | 15  | 32    | 40.0   | True   | chr4:25665952,chr6:117645578  | Fusion            |
| 13 | SLC45A3::BRAF   | 51  | 280   | 3.67   | True   | chr1:205649522,chr7:140494267 | Fusion            |
| 14 | TPM3::NTRK1     | 78  | 305   | 96.52  | True   | chr1:154142876,chr1:156844363 | Fusion            |

SS—number of supportive reads with unique start sites; Reads—total number of supportive reads; %Reads—percent of reads at breakpoint supporting fusion; Breakpoint—the breakpoints associated with the event, in hg19 coordinates;

**Table S2.** Sample reads statistics summary (Archer FusionPlex lung NGS panel).

| Sample | Read Statistics |               |                        | RNA Statistics        |                |        |
|--------|-----------------|---------------|------------------------|-----------------------|----------------|--------|
|        | Total Fragments | All Fragments | Unique Fragments / (%) | All RNA Reads (# / %) | Molecular Bins | QC     |
| M-1    | 442458          | 358947        | 295337 / 82.3          | 285420 / 80.9         | 237167         | 426.00 |
| M-3    | 818403          | 685516        | 303863 / 44.3          | 553148 / 82.8         | 257993         | 503.88 |
| M-6    | 1564753         | 1189940       | 480504 / 40.4          | 961445 / 81.9         | 416735         | 585.25 |
| M-11   | 448852          | 365124        | 208142 / 57.0          | 268863 / 75.9         | 158315         | 370.12 |
| M-17   | 1382865         | 1103500       | 457953 / 41.5          | 892296 / 82.4         | 382548         | 501.62 |
| M-19   | 1045908         | 893791        | 273189 / 30.6          | 776767 / 88.4         | 241792         | 542.00 |
| M-20   | 1140463         | 919577        | 295755 / 32.2          | 738436 / 81.8         | 251683         | 545.50 |
| M-28   | 582092          | 491342        | 288658 / 58.7          | 417189 / 86.2         | 250578         | 484.25 |
| M-33   | 838437          | 688660        | 315924 / 45.9          | 510414 / 76.3         | 246180         | 535.75 |
| M-35   | 765340          | 607019        | 391324 / 64.5          | 475675 / 80.5         | 311595         | 422.62 |
| M-37   | 386620          | 323577        | 219068 / 67.7          | 261060 / 82.3         | 180653         | 449.62 |
| M-51   | 1134709         | 906409        | 471468 / 52.0          | 772485 / 86.7         | 413239         | 493.12 |
| M-61   | 878679          | 725365        | 270845 / 37.3          | 601831 / 84.2         | 235048         | 494.75 |
| M-67   | 1248332         | 975409        | 406313 / 41.7          | 774395 / 81.3         | 333586         | 540.62 |

|         |         |         |               |                |        |        |
|---------|---------|---------|---------------|----------------|--------|--------|
| M-70    | 1089699 | 855179  | 314621 / 36.8 | 686653 / 82.5  | 265252 | 529.75 |
| M-77    | 1737707 | 1298013 | 319942 / 24.6 | 1042421 / 81.5 | 272117 | 563.62 |
| M-83    | 1379884 | 1156964 | 507774 / 43.9 | 946898 / 83.4  | 429997 | 557.5  |
| M-88    | 578896  | 487094  | 304241 / 62.5 | 407034 / 84.8  | 261356 | 469.0  |
| M-89    | 1442977 | 1169658 | 146090 / 12.5 | 834129 / 76.9  | 125910 | 390.0  |
| M-105   | 657090  | 500899  | 369633 / 73.8 | 416322 / 85.3  | 311313 | 440.62 |
| M-106   | 1531962 | 1188924 | 575429 / 48.4 | 927132 / 79.3  | 466665 | 460.38 |
| M-108   | 1640788 | 1297094 | 574905 / 44.3 | 1122865 / 87.7 | 495717 | 535.50 |
| M-112   | 1157123 | 904041  | 457529 / 50.6 | 737722 / 83.2  | 385149 | 471.12 |
| M-113   | 1608493 | 1353020 | 713456 / 52.7 | 1089826 / 81.9 | 585501 | 582.88 |
| M-115   | 669330  | 499009  | 278553 / 55.8 | 386227 / 79.4  | 222485 | 460.62 |
| M-119   | 1167205 | 928227  | 403116 / 43.4 | 754229 / 82.4  | 343239 | 524.50 |
| M-123   | 1551304 | 1253157 | 487248 / 38.9 | 1038901 / 84.3 | 422418 | 607.38 |
| M-129   | 1399912 | 1104962 | 458790 / 41.5 | 931476 / 85.7  | 399916 | 558.50 |
| M-134   | 1126443 | 868952  | 533402 / 61.4 | 732420 / 85.7  | 456270 | 521.62 |
| M-135   | 735821  | 561047  | 178503 / 31.8 | 477560 / 86.8  | 154264 | 435.12 |
| M-138   | 1124711 | 900483  | 350051 / 38.9 | 740566 / 84.1  | 303917 | 421.88 |
| M-142   | 1168796 | 936669  | 545792 / 58.3 | 776320 / 84.3  | 453395 | 516.88 |
| M-146   | 1975114 | 1636254 | 709671 / 43.4 | 1309238 / 82.3 | 595277 | 589.88 |
| M-155   | 1198981 | 933605  | 431032 / 46.2 | 742163 / 80.9  | 359546 | 547.00 |
| M-176   | 1382865 | 1103500 | 457953 / 41.5 | 892296 / 82.4  | 382548 | 593.88 |
| M-180   | 1766592 | 1403860 | 714452 / 50.9 | 1128166 / 81.5 | 582685 | 525.38 |
| M-183   | 1139587 | 900796  | 357327 / 39.7 | 755451 / 85.1  | 312418 | 580.00 |
| M-186   | 1791864 | 1366694 | 496316 / 36.3 | 1139835 / 84.9 | 420990 | 570.50 |
| M-187   | 1277150 | 1005365 | 331151 / 32.9 | 777421 / 79.4  | 266981 | 541.75 |
| M-189   | 1568574 | 1225003 | 568216 / 46.4 | 955858 / 79.4  | 461389 | 524.62 |
| M-20P   | 1643433 | 1306916 | 265691 / 20.3 | 1053900 / 82.4 | 219796 | 491.00 |
| M-33P   | 1101458 | 844861  | 285215 / 33.8 | 658295 / 80.1  | 234084 | 467.00 |
| M-61P   | 1142129 | 897597  | 209639 / 23.4 | 719612 / 82.2  | 177342 | 493.12 |
| M-135P  | 638460  | 491283  | 193600 / 39.4 | 395420 / 82.8  | 161865 | 447.75 |
| M-138P  | 690217  | 508685  | 120568 / 23.7 | 390375 / 79.6  | 96430  | 387.38 |
| Seraseq | 1314536 | 960282  | 107686 / 11.2 | 678839 / 73.5  | 71736  | 242.50 |
| HORIZON | 3500000 | 2762989 | 284911 / 10.3 | 1983390 / 73.1 | 187256 | 285.50 |

Total Fragments—Total number of read (pairs) that were present in the original FASTQ file; All Fragments—indicates the non-deduplicated raw read(s) or read pairs; Unique Fragments—indicates the de-duplicated reads, based on either the alignment or the molecular barcode; All RNA Reads (# / %) Total and percentage of reads that likely come from an RNA source; reads that span exon-exon splice junctions. indicates the non-deduplicated raw read(s) or read pairs; Molecular Bins—Unique fragments/molecules from the original sample, as determined by use of molecular barcodes (MBCs) and deduplication. Molecular bins are defined as reads having the same random molecular barcode in the ligated adapter. This also requires the reads to have all the same start sites. The same MBC sequence could be seen in different start site locations. QC—Average Unique RNA Start Sites per Control GSP2

## Supplementary Figures

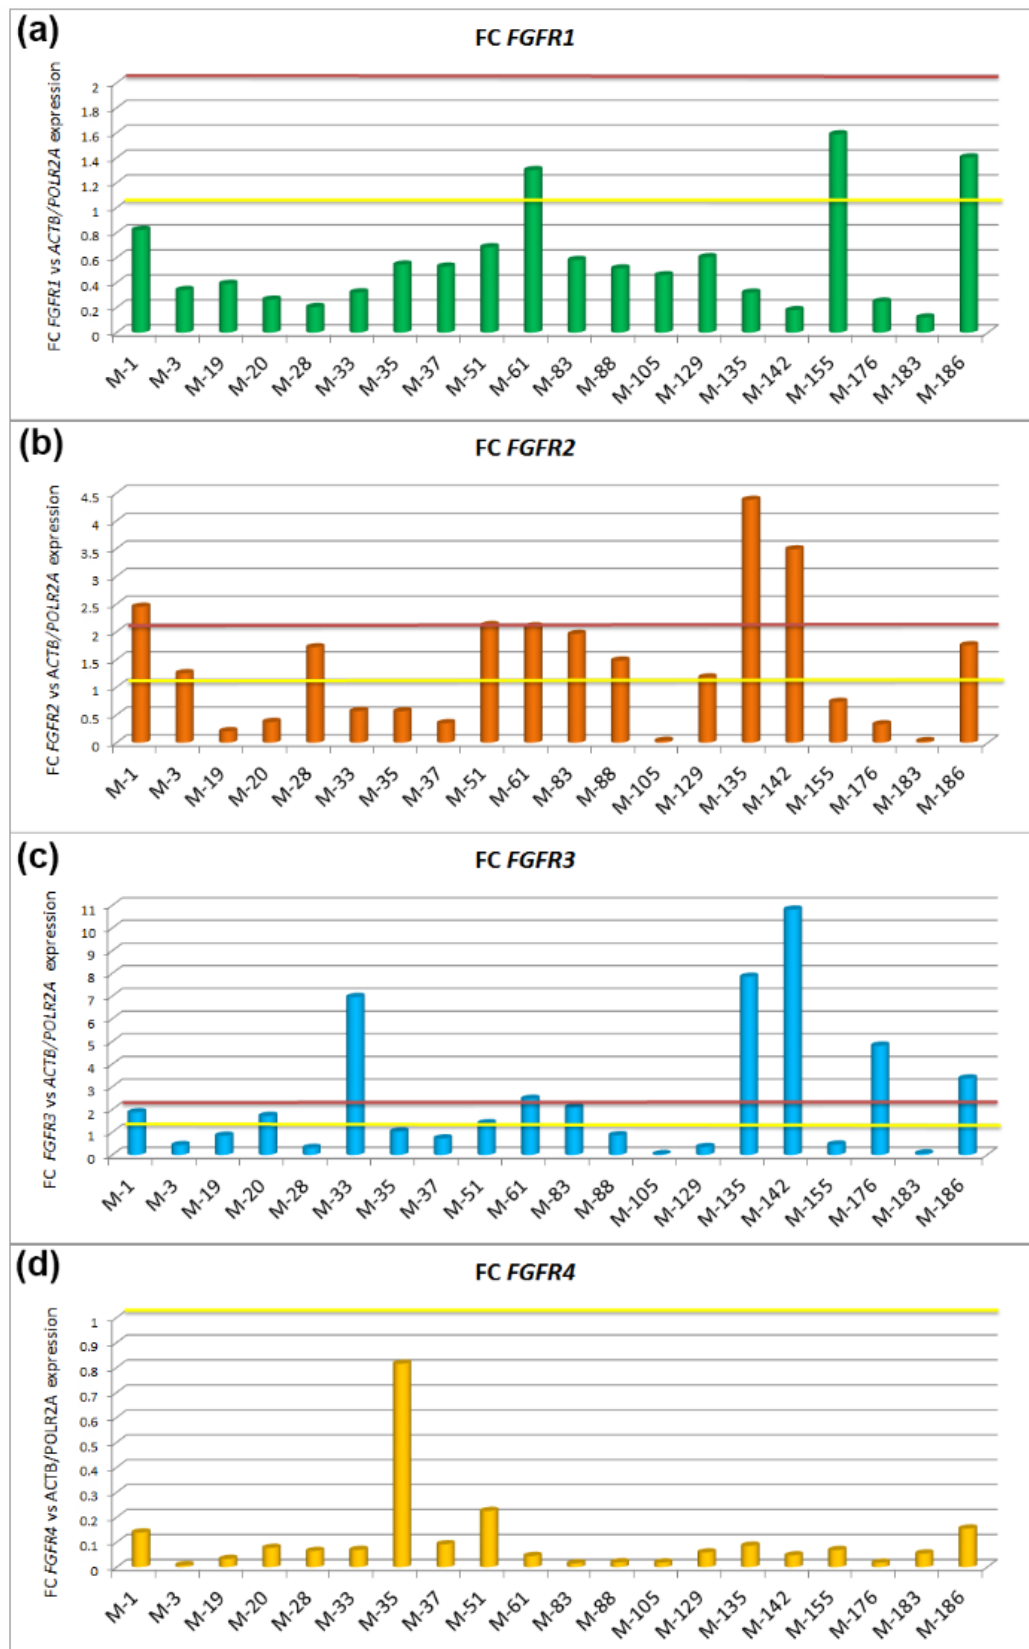

**Figure S1.** Fold change of RT-PCR *FGFR1–4* gene expression (a–d) in Sq-NSCLC vs. corresponding tumor-adjacent normal tissues (n = 20). The bars on the graphs over the baseline (fold change > 1) indicate the increase in gene expression compared to adjacent normal tissue from the same patient, while the bars under the baseline (fold change < 1) indicate a decrease in gene expression.

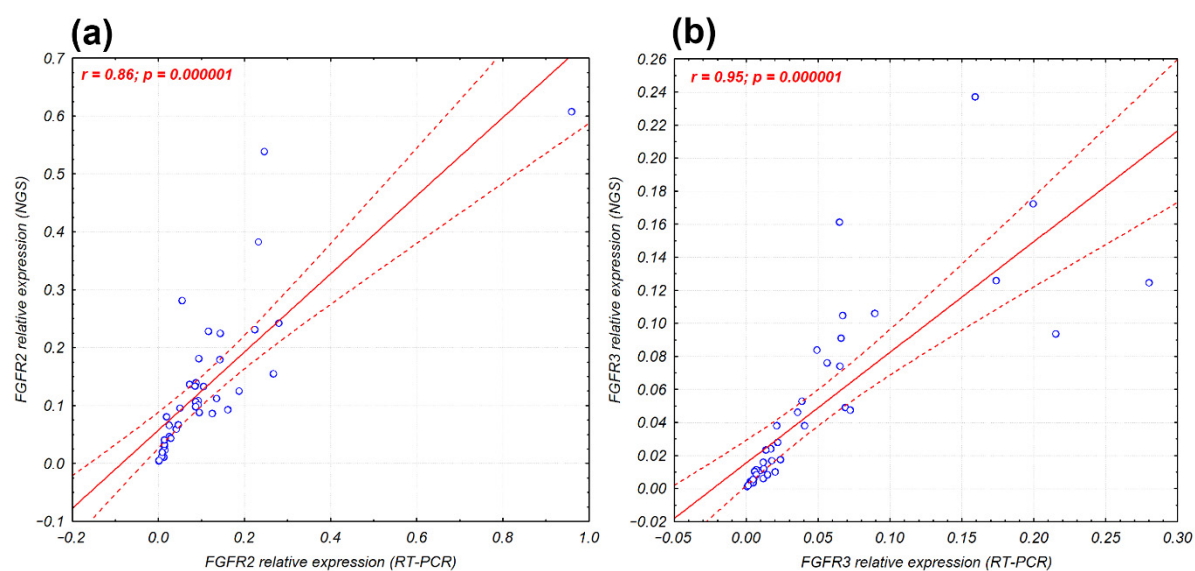

**Figure S2.** Correlation scatter plot of the (a) *FGFR2* and (b) *FGFR3* gene expression assessed by RT-PCR and NGS (Archer Lung FusionPlex) in 40 Sq-NSCLC tumor samples.

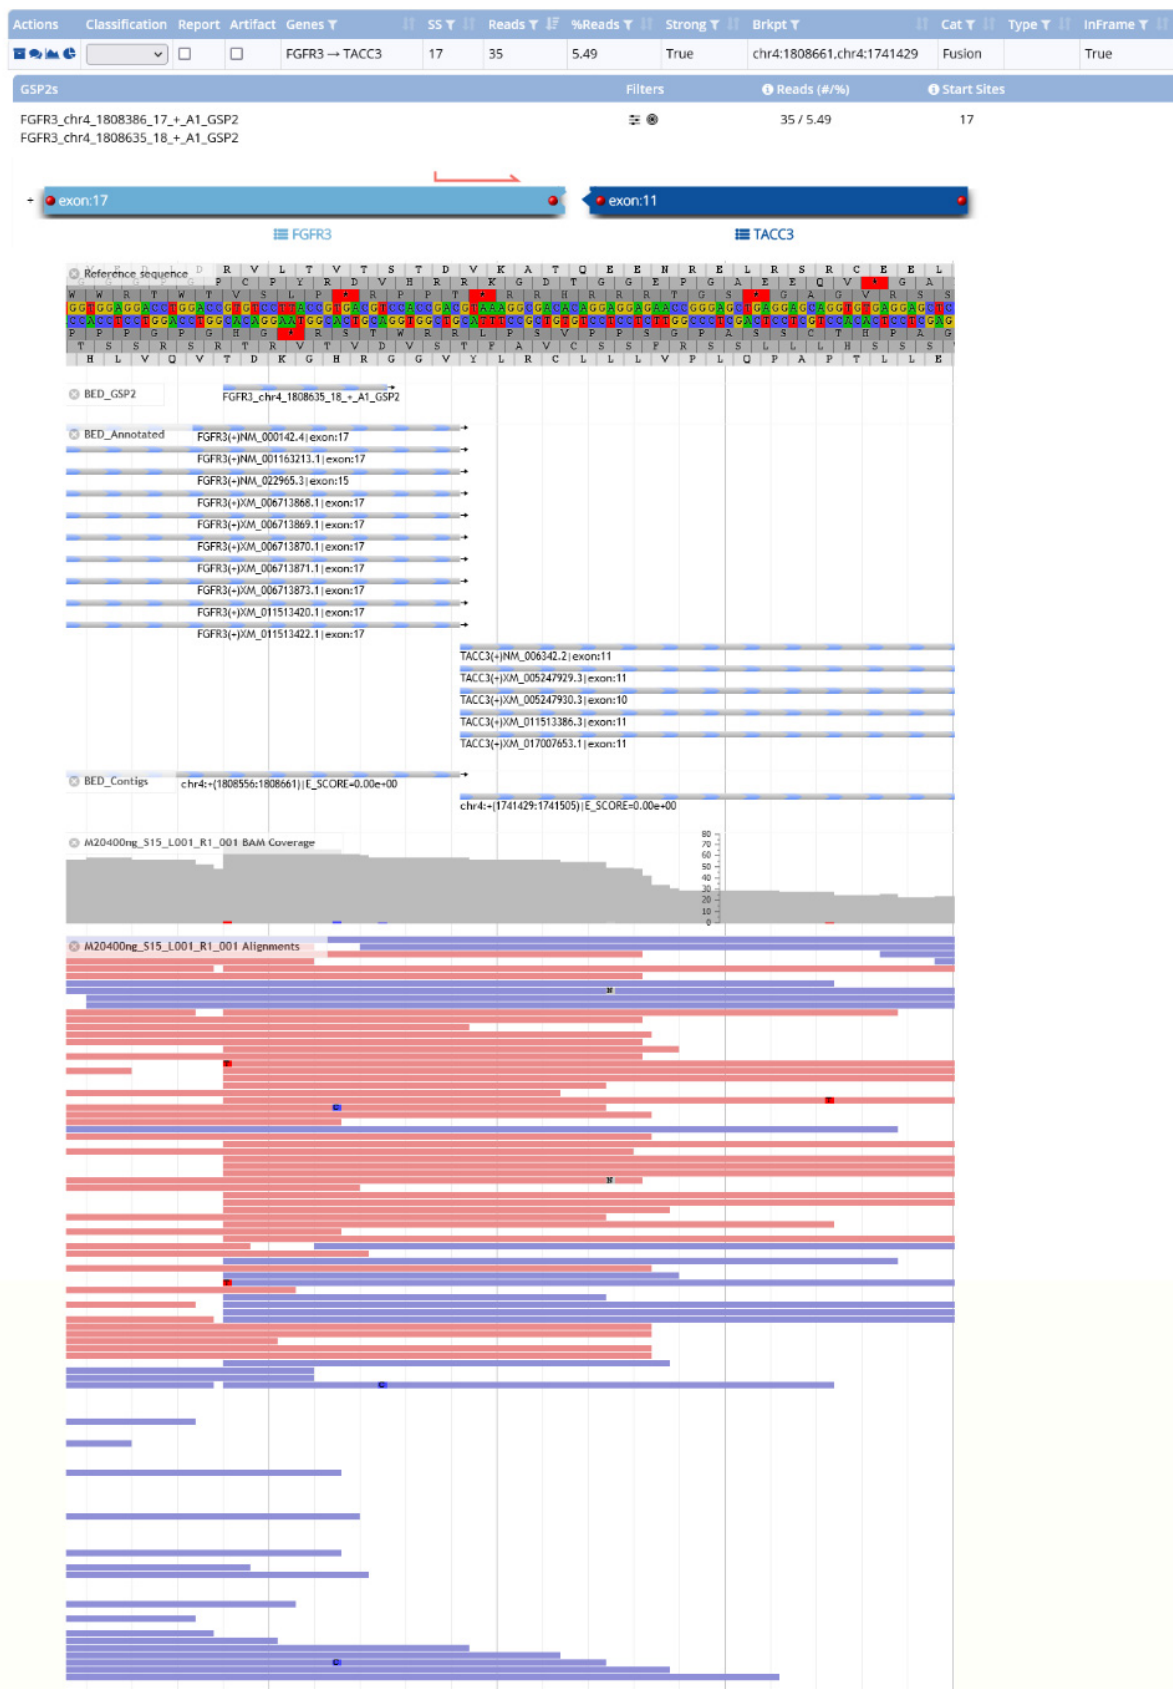

**Figure S3.** FGFR3::TACC3 fusion (M-20). FGFR3:NM\_000142.4: exon:17; TACC3: NM\_006342.2: exon:11.

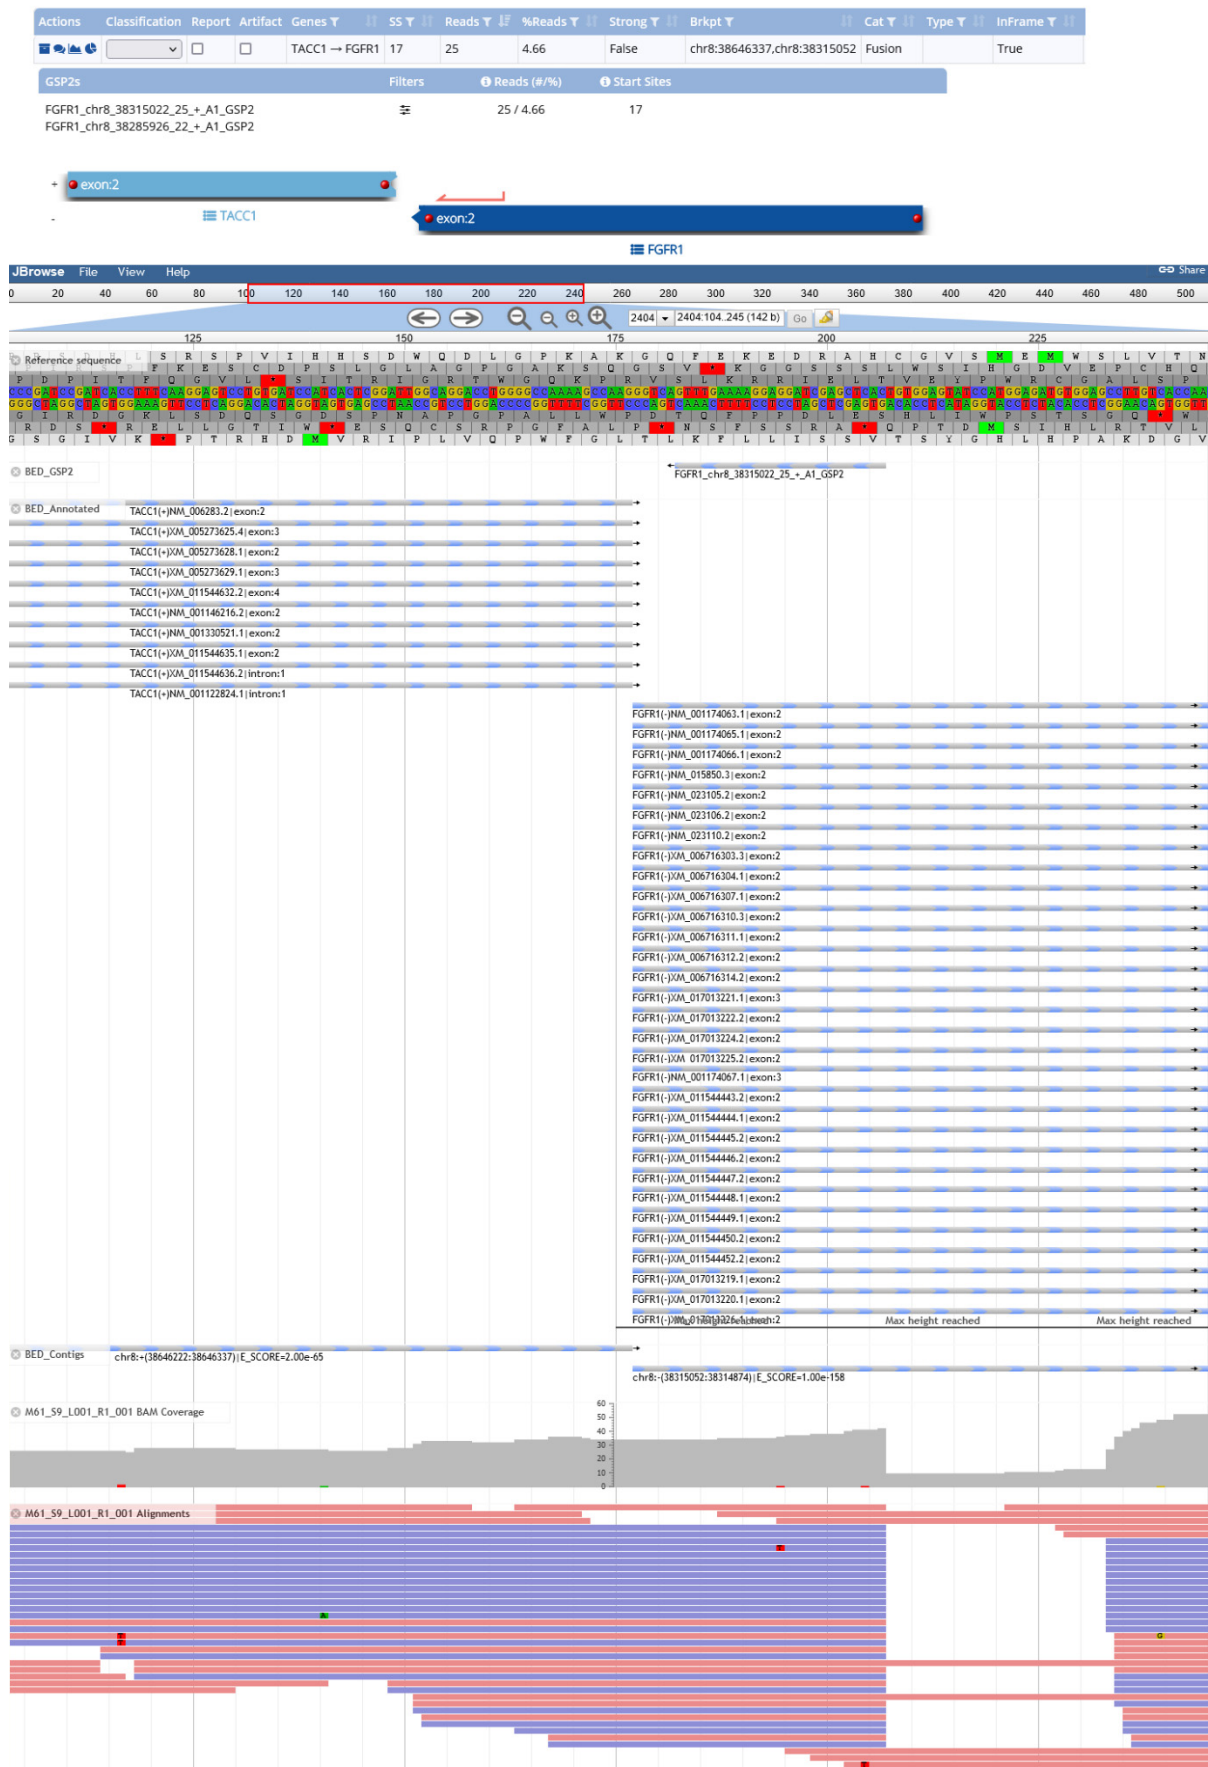

**Figure S4.** TACC1:FGFR1 fusion (M-61) TACC1: NM\_006283.2:exon:2; FGFR1: NM\_023110.3:exon:2.

**Ranking Order (Better--Good--Average)**

|                | <b>(a) Tumor tissue</b> |        |       |       |       |       | <b>(b) Tumor-adjacent tissue</b> |       |        |        |       |       | <b>(c) All samples</b> |       |        |       |       |       |
|----------------|-------------------------|--------|-------|-------|-------|-------|----------------------------------|-------|--------|--------|-------|-------|------------------------|-------|--------|-------|-------|-------|
| Method/Ranking | 1                       | 2      | 3     | 4     | 5     | 6     | 1                                | 2     | 3      | 4      | 5     | 6     | 1                      | 2     | 3      | 4     | 5     | 6     |
| Delta CT       | ACTB                    | POLR2A | YWHAZ | HGPRT | B2M   | GAPDH | ACTB                             | HGPRT | POLR2A | B2M    | YWHAZ | GAPDH | POLR2A                 | HGPRT | ACTB   | YWHAZ | B2M   | GAPDH |
| BestKeeper     | POLR2A                  | ACTB   | YWHAZ | B2M   | HGPRT | GAPDH | POLR2A                           | HGPRT | ACTB   | YWHAZ  | B2M   | GAPDH | POLR2A                 | ACTB  | B2M    | YWHAZ | HGPRT | GAPDH |
| Normfinder     | POLR2A                  | ACTB   | YWHAZ | HGPRT | B2M   | GAPDH | ACTB                             | HGPRT | POLR2A | B2M    | YWHAZ | GAPDH | POLR2A                 | HGPRT | ACTB   | YWHAZ | B2M   | GAPDH |
| Genorm         | POLR2A  <br>ACTB        |        | B2M   | YWHAZ | HGPRT | GAPDH | YWHAZ  <br>B2M                   |       | ACTB   | POLR2A | HGPRT | GAPDH | B2M  <br>ACTB          |       | POLR2A | HGPRT | YWHAZ | GAPDH |

**Recommended comprehensive ranking**

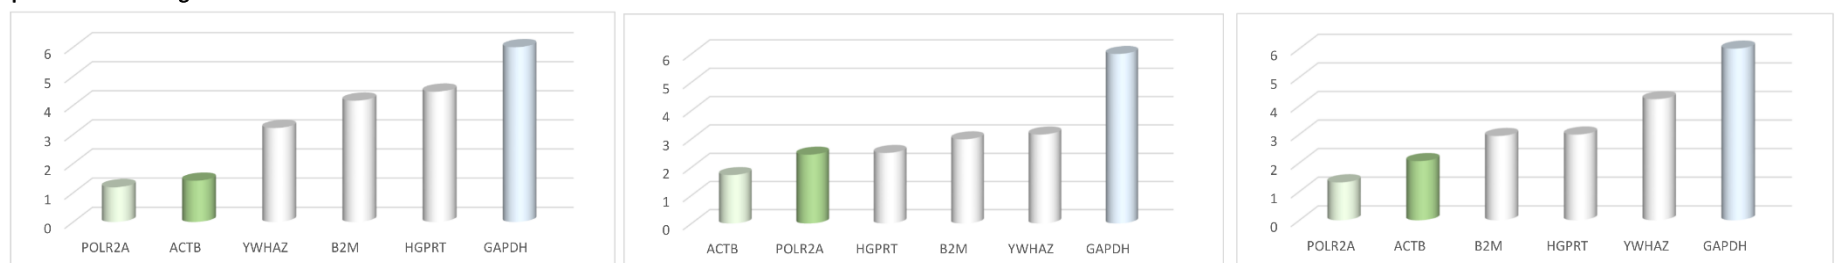

**Figure S5.** Expression stability ranking of six selected genes analyzed using RefFinder software. Results from GeNorm, Normfinder, BestKeeper, and  $\Delta$ CT algorithms and summary of the results based on the four algorithms (from the most to the least stable expression) in (a) tumor tissue (n = 32); (b) tumor-adjacent normal tissue (n = 15); and (c) all analyzed samples (n = 47).
